# Supplementary material
Source: PubMed Central journal article supplement (PMC1838475)

**CFG-1**

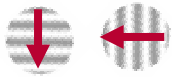

**CFG-2**

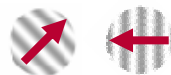

**(a)**

horizontal eye displacement

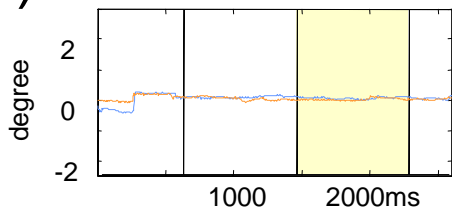

horizontal eye displacement

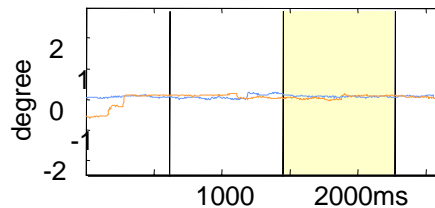

— BRFS  
SEQUENCE A

— BRFS  
SEQUENCE B

**(b)**

vertical eye displacement

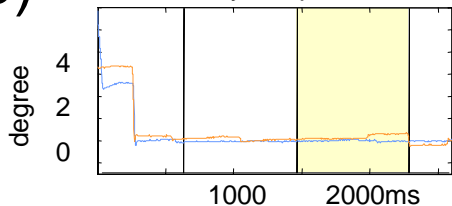

vertical eye displacement

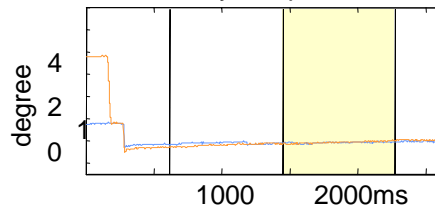

**(c)**

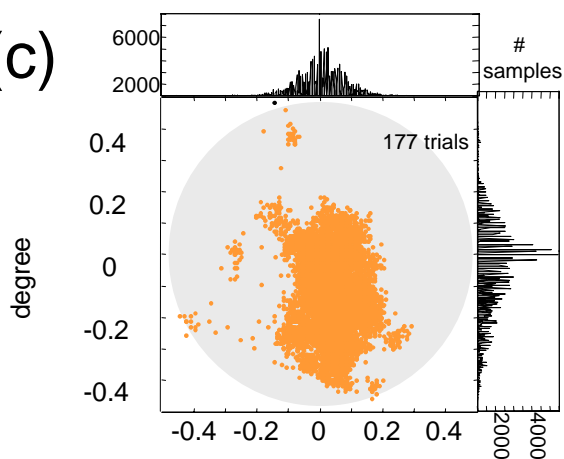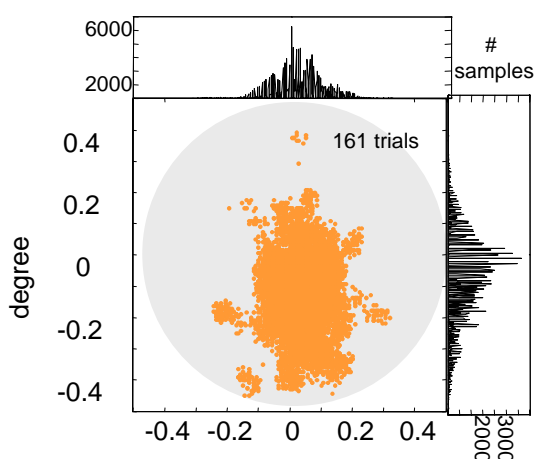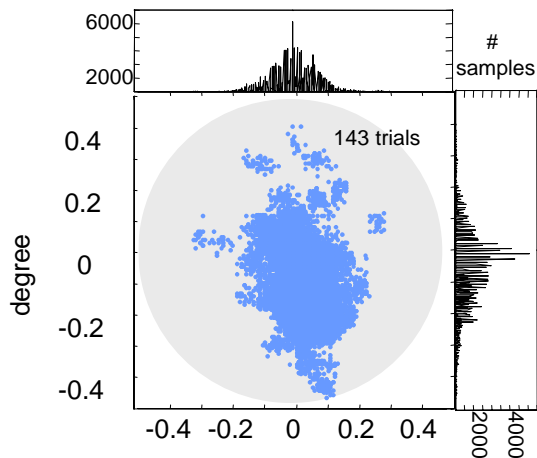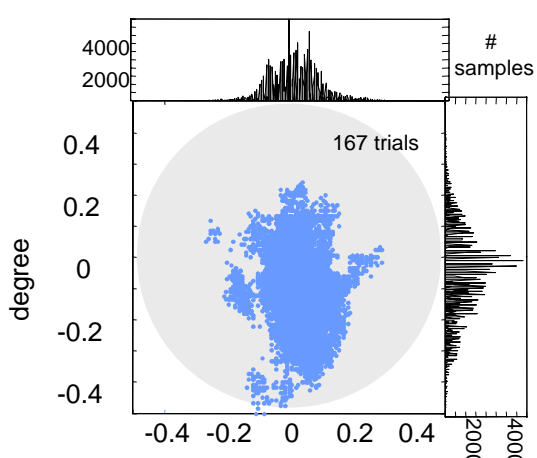

Supplement: pnas_0608489104_4.pdf [file pnas_0608489104_4.pdf]
