# Supplementary material
Source: PubMed Central journal article supplement (PMC1838475)

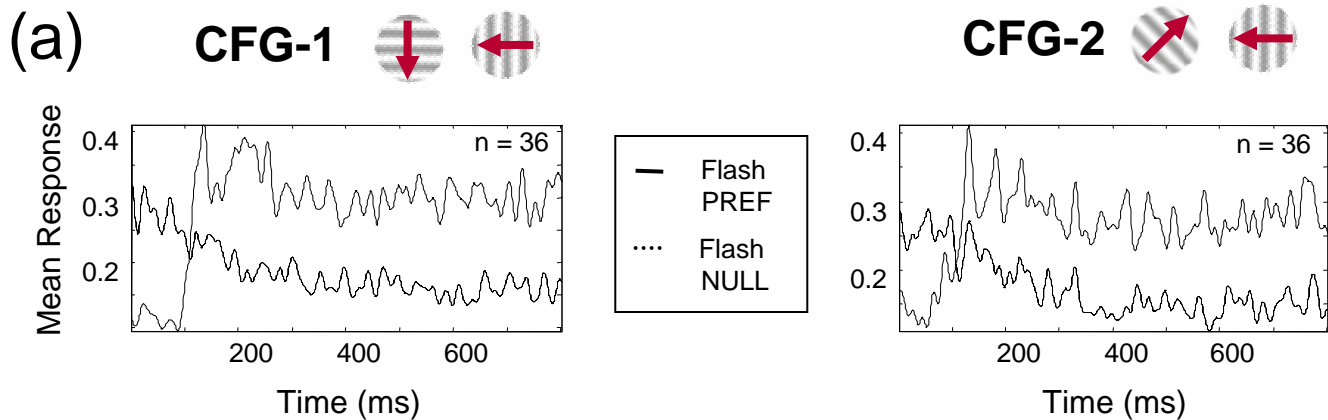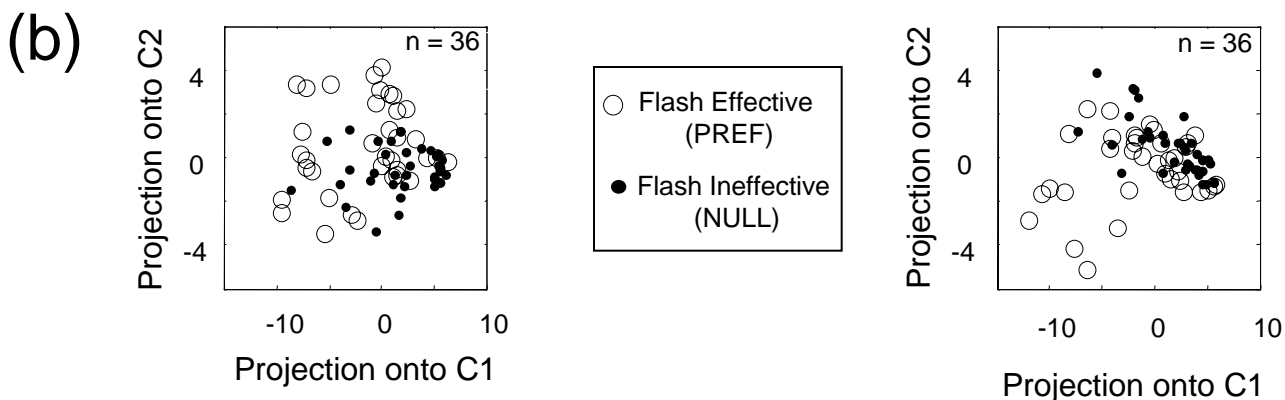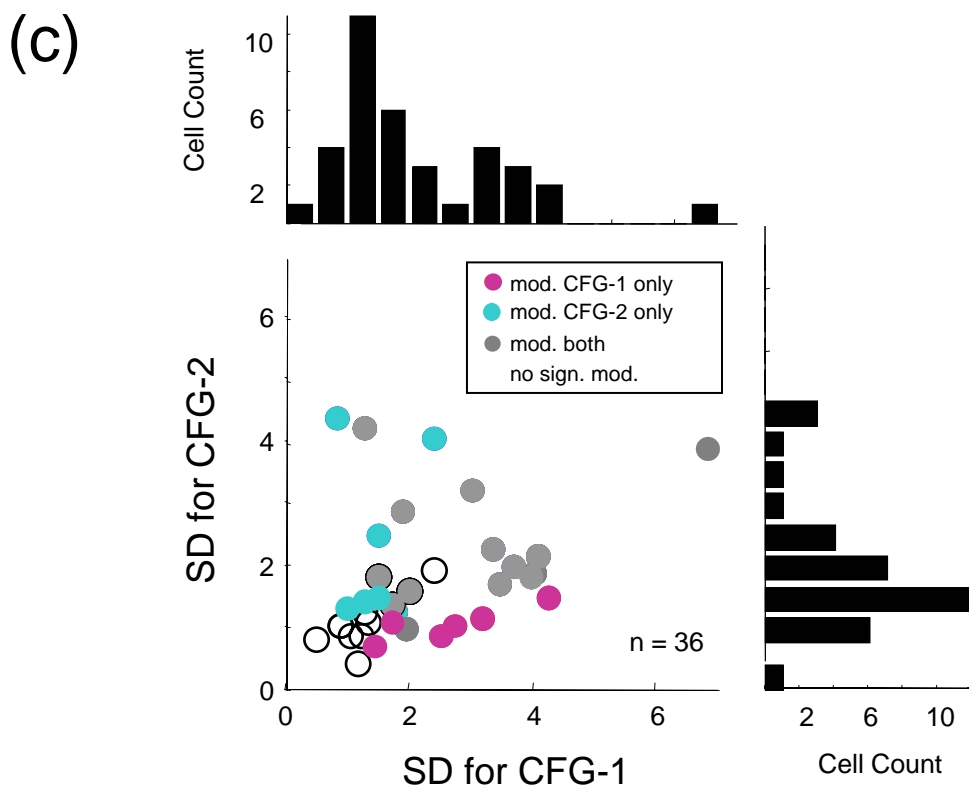

Supplement: pnas_0608489104_1.pdf [file pnas_0608489104_1.pdf]

Figure 6

(a)

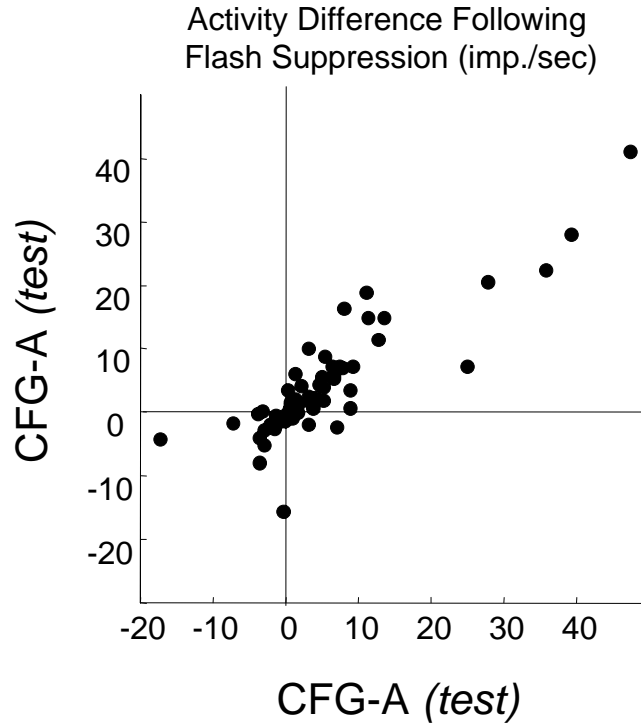

(b)

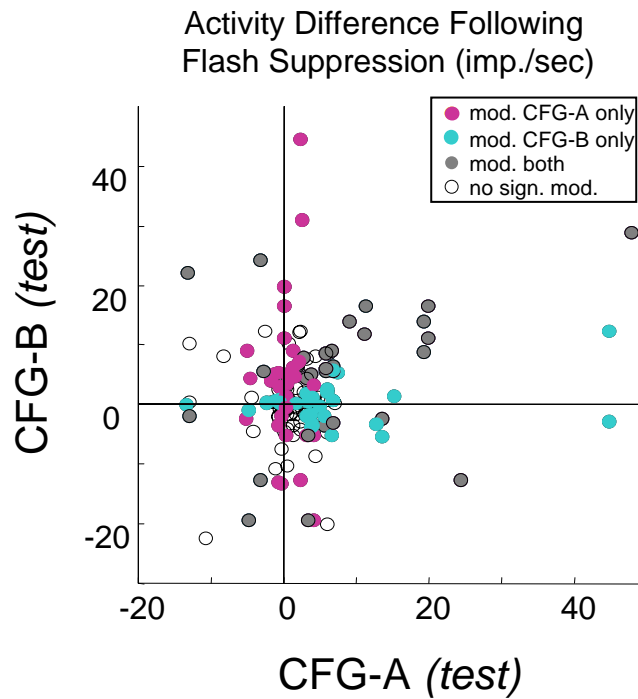

Supplement: pnas_0608489104_2.pdf [file pnas_0608489104_2.pdf]

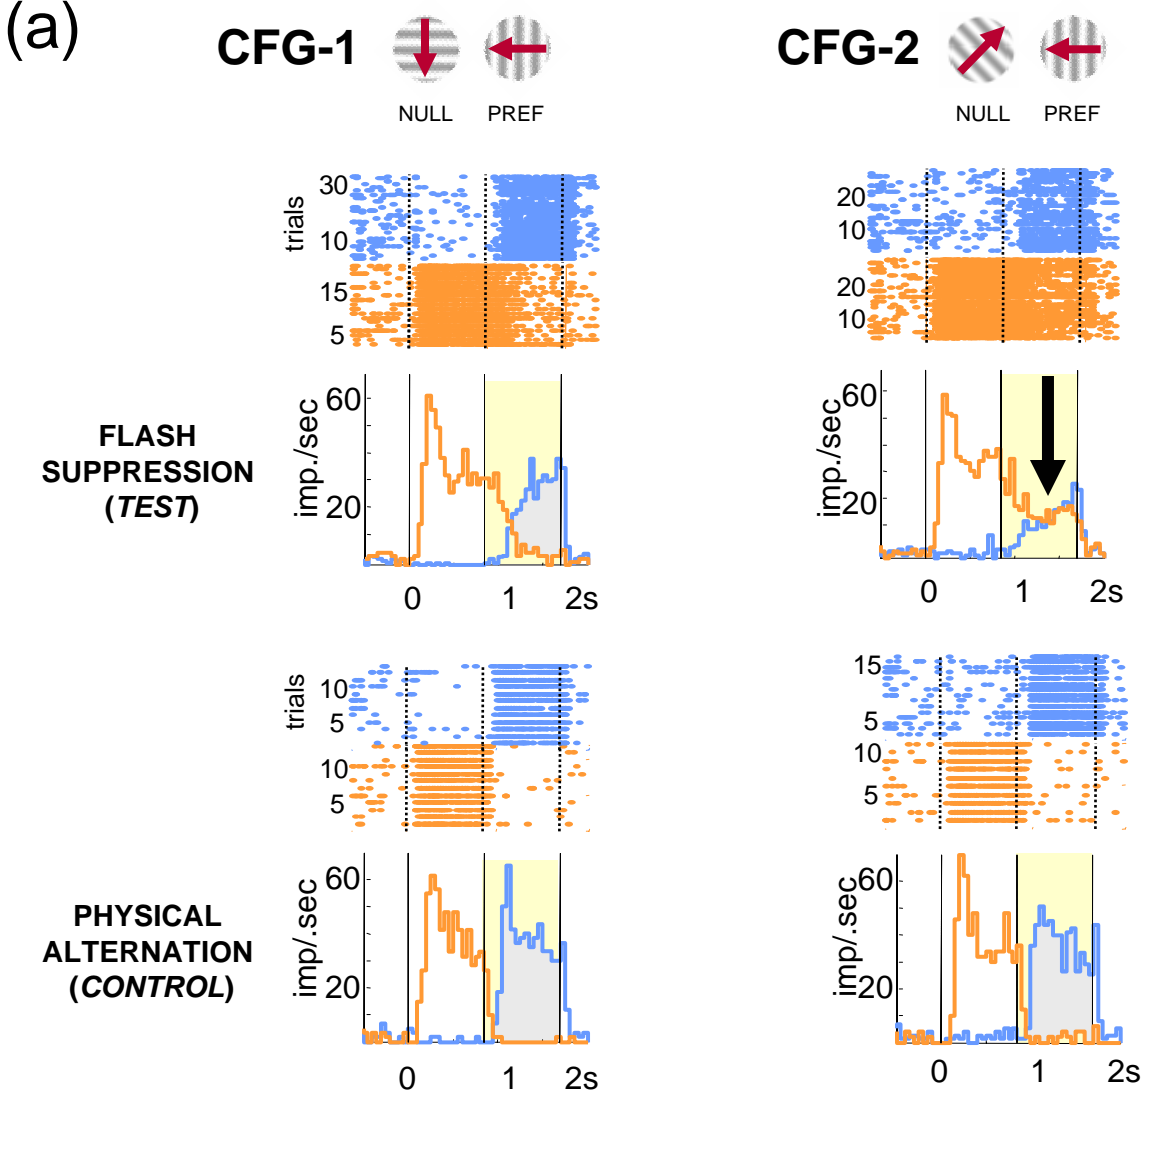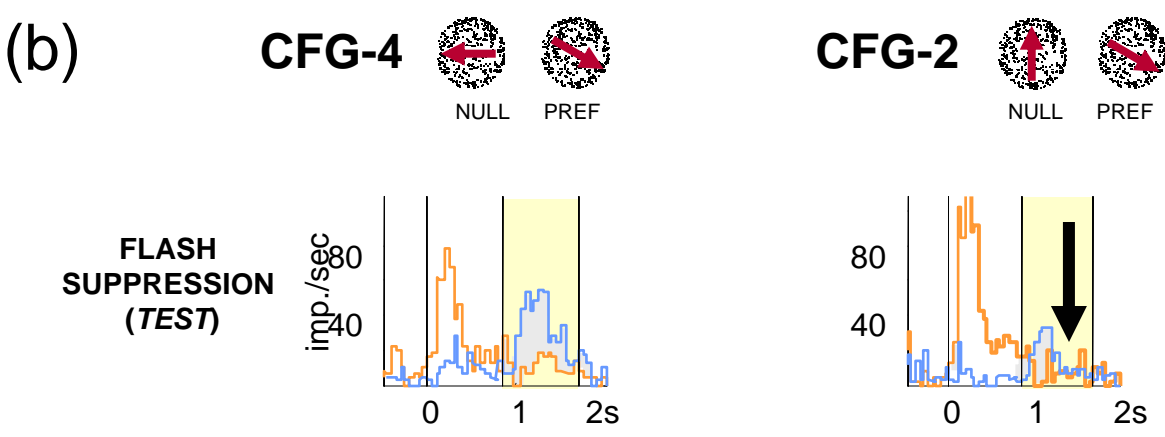

Supplement: pnas_0608489104_5.pdf [file pnas_0608489104_5.pdf]
